# Supplementary material for: Ionogel impregnated glass ionomer cement and the effect of nanoparticle additives
Source: Royal Society of Chemistry journal article supplement (doi:10.1039/d4ma00592a), 2024-01-01
Supplement: d4ma00592a1.pdf [file d4ma00592a1.pdf]

*Supporting information*

**Ionogel Impregnated Glass Ionomer Cement and the Effect of Nanoparticle Additives**

**Sreejith Sasidharan Lathikumari, Manju Saraswathy\***

*Division of Dental Products, Department of Biomaterial Science and Technology, Biomedical Technology Wing, Sree Chitra Tirunal Institute for Medical Sciences and Technology, Thiruvananthapuram, -695012, India.*

\*Corresponding author: [manjus@sctimst.ac.in](mailto:manjus@sctimst.ac.in)

**Estimation of monomers.**

The presence of residual monomers in the polyalkenoic acid formulation was confirmed and estimated using HPLC method. The HPLC analysis was conducted using a mobile phase of acetonitrile (90%) and 0.1% phosphoric acid (10%) at a flow rate of 0.6 ml/min.

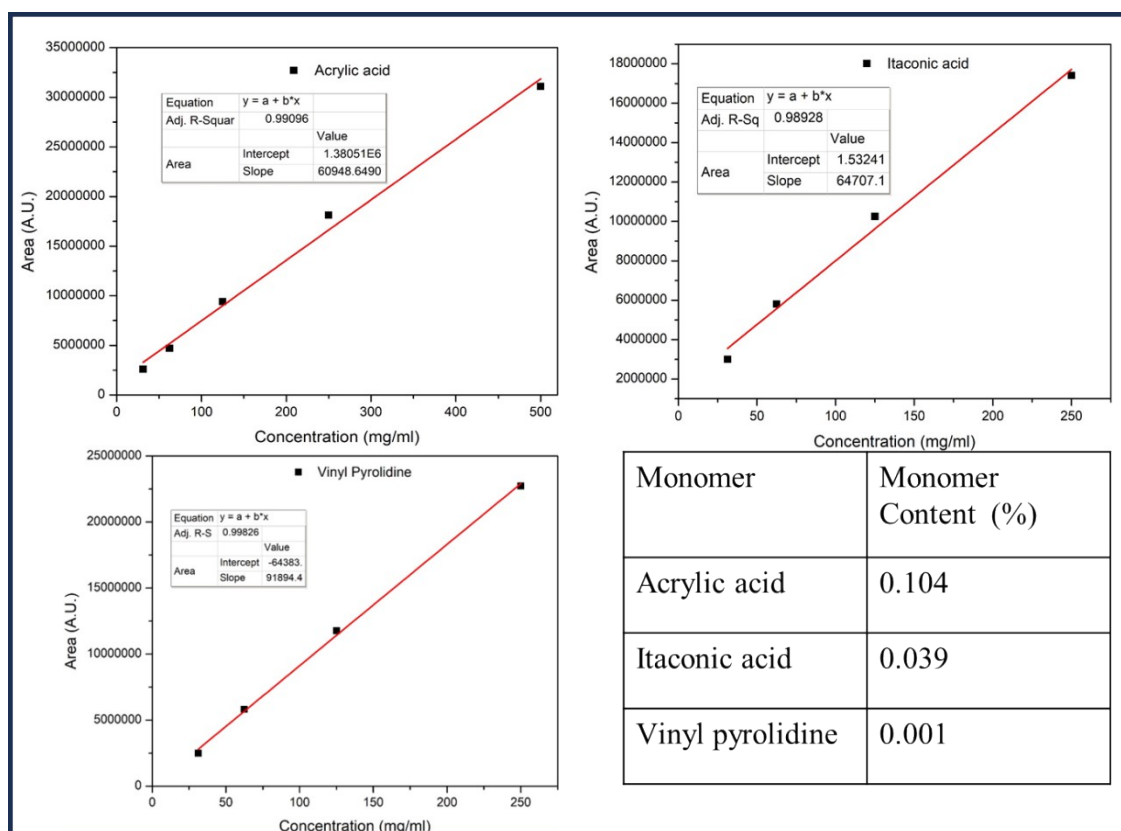

Figure S1: The calibration curve and residual monomer content in poly (AA-co-IA-co-VP) formulation (The residual monomer content was less than 1%).

## Fusing mixture Composition

Table T1: Composition of the glass powder

| Name of the chemical constituent | Weight (g) |
|----------------------------------|------------|
| Quartz                           | 17.4930    |
| Aluminum Oxide                   | 9.9743     |
| Aluminum fluoride trihydrate     | 3.1889     |
| Aluminum phosphate               | 6.0003     |
| Strontium fluoride               | 20.7030    |
| Sodium hexafluoroaluminate       | 3.0012     |

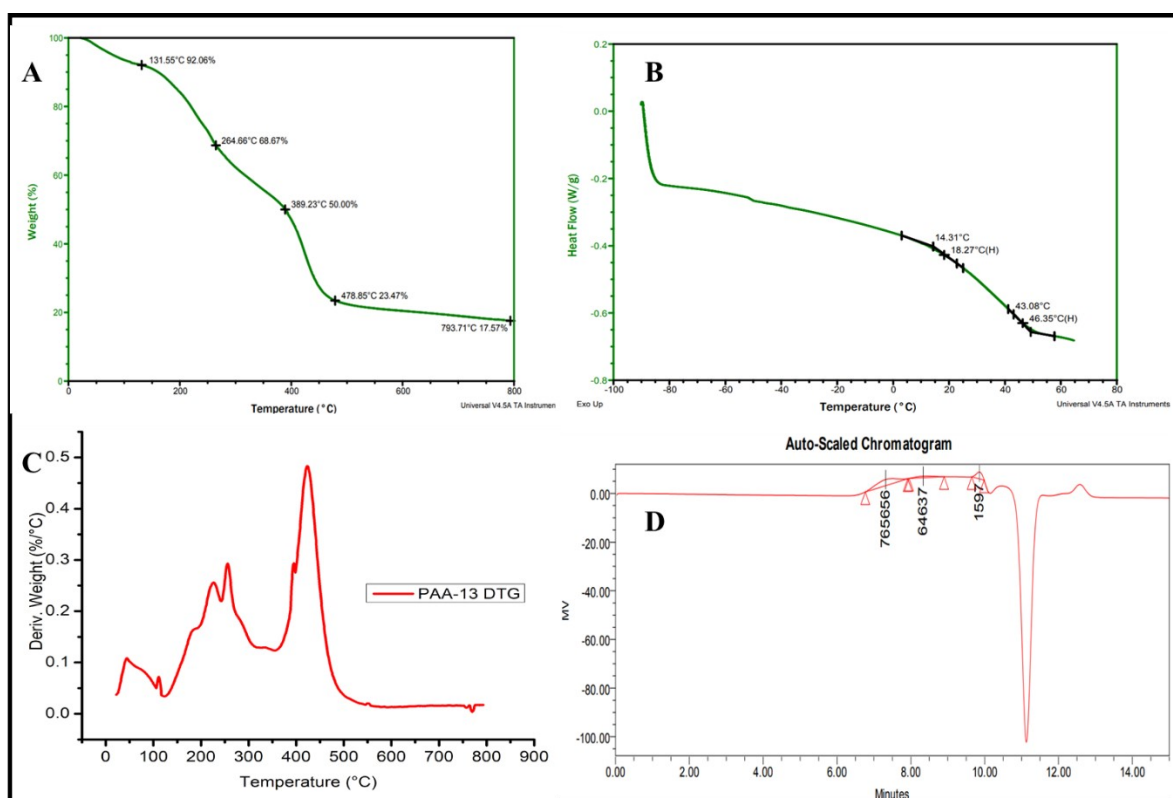

Figure S2: (A) Molecular weight (Mw) of synthesized poly (AA-co-IA-co-VP) (B) TGA curve of poly (AA-co-IA-co-VP) (C) DTG of poly (AA-co-IA-co-VP) (D) DSC Curve showing Tg of poly (AA-co-IA-co-VP)

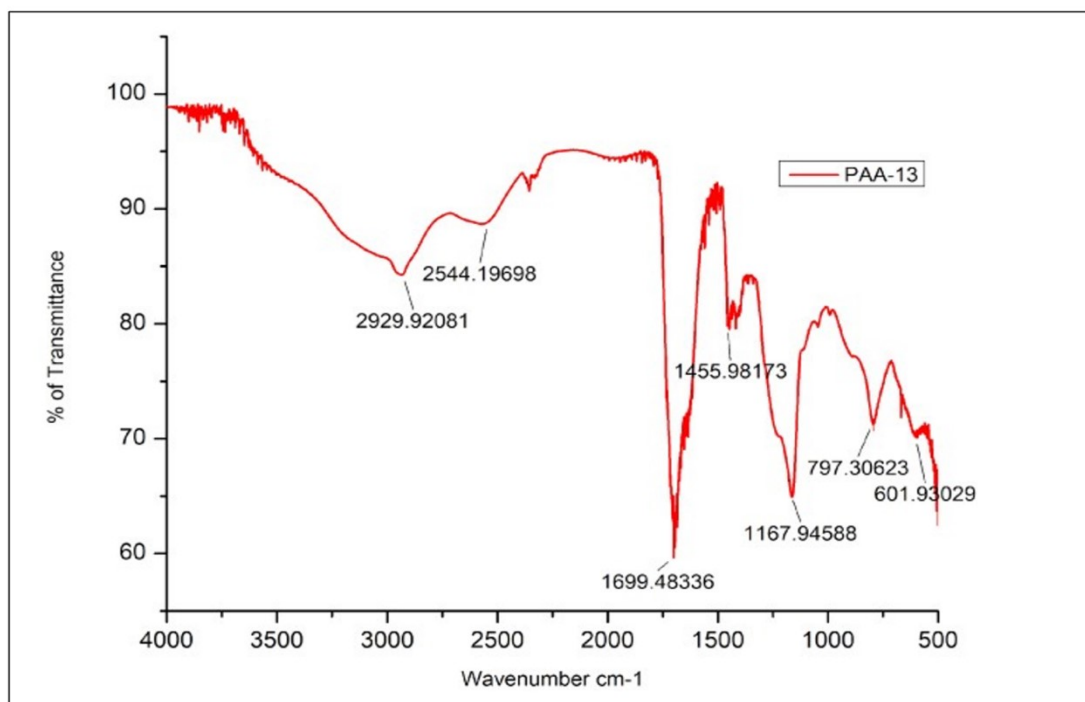

Figure S3: FTIR Spectra of poly (AA-co-IA-co-VP)

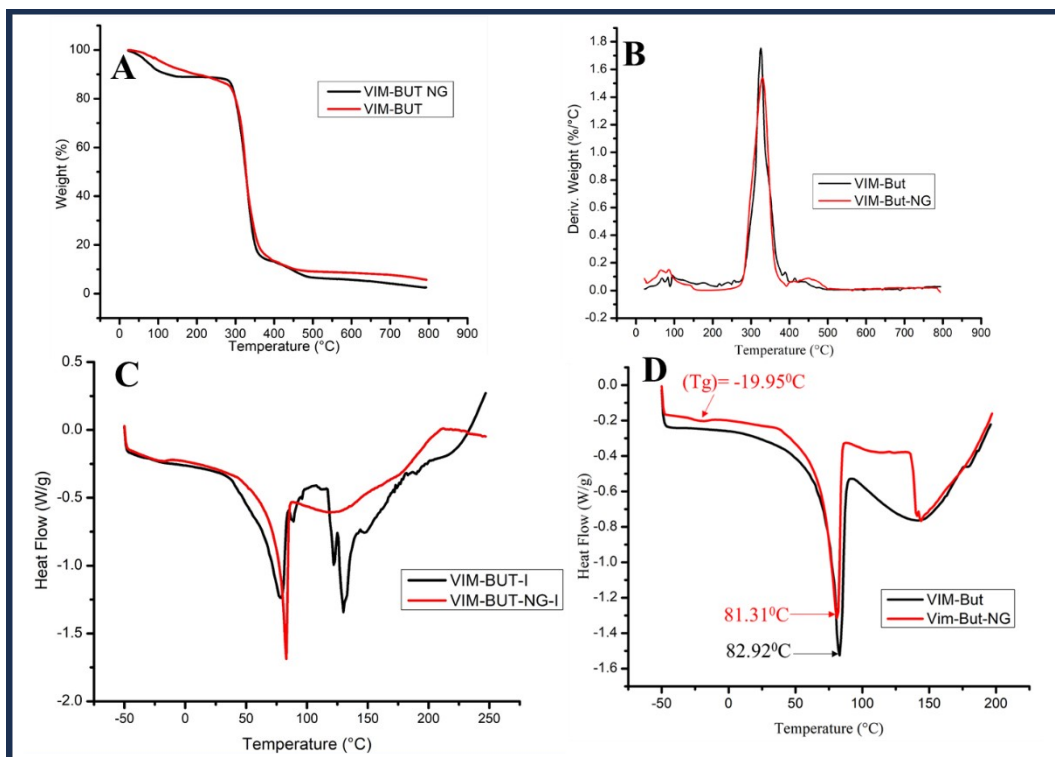

Figure S4: Comparison of thermal properties of ionogel and monomer (A) TGA of monomer and ionogel (B) DTG of ionogel and monomer (C) First heat of ionogel and monomer (D) Second heat of nanogel and monomer

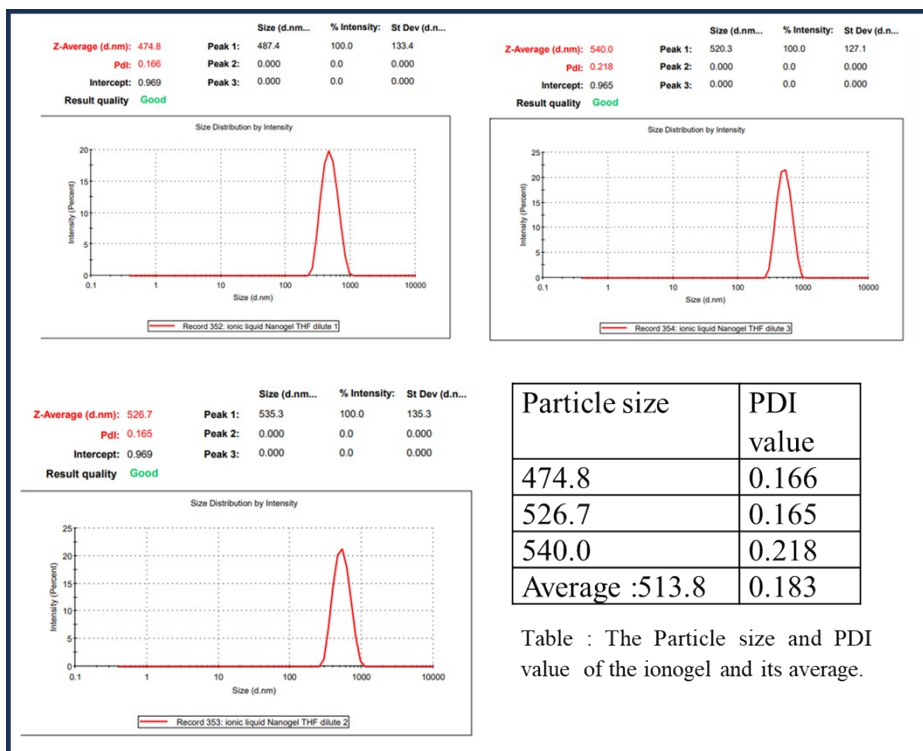

Figure S5: The particle size of the ionogel measured using dynamic light scattering

## Clinical Observation Table

### Experimental design. I

| Details                 | Extraction media : Physiological saline |         |
|-------------------------|-----------------------------------------|---------|
|                         | Test                                    | Control |
| No. of animals          | 5                                       | 5       |
| Name of species         | Mice                                    |         |
| Name of strain          | Swiss albino                            |         |
| Sex of the animal       | Male/Female                             |         |
| Body weight             | 17-23                                   |         |
| Route of the injection  | Intravenous                             |         |
| Dosage of the injection | 50mL/kg                                 |         |

Table: T2: The physiological saline extract of the test material was injected to the mice and the animals were observed immediately after injection and at 4h, 24h, 48h, and 72h for the evidence of any abnormalities, loss in body weight or death. The data was collated in the table.





|                       |         |       |       |      |       |       |       |       |      |       |      |
|-----------------------|---------|-------|-------|------|-------|-------|-------|-------|------|-------|------|
| Motor                 | Imm./4h | N     | N     | N    | N     | N     | N     | N     | N    | N     | N    |
|                       | 24h     | N     | N     | N    | N     | N     | N     | N     | N    | N     | N    |
|                       | 48h     | N     | N     | N    | N     | N     | N     | N     | N    | N     | N    |
|                       | 72h     | N     | N     | N    | N     | N     | N     | N     | N    | N     | N    |
| Convulsion            | Imm./4h | N     | N     | N    | N     | N     | N     | N     | N    | N     | N    |
|                       | 24h     | N     | N     | N    | N     | N     | N     | N     | N    | N     | N    |
|                       | 48h     | N     | N     | N    | N     | N     | N     | N     | N    | N     | N    |
|                       | 72h     | N     | N     | N    | N     | N     | N     | N     | N    | N     | N    |
| Reflexes              | Imm./4h | N     | N     | N    | N     | N     | N     | N     | N    | N     | N    |
|                       | 24h     | N     | N     | N    | N     | N     | N     | N     | N    | N     | N    |
|                       | 48h     | N     | N     | N    | N     | N     | N     | N     | N    | N     | N    |
|                       | 72h     | N     | N     | N    | N     | N     | N     | N     | N    | N     | N    |
| Ocular signs          | Imm./4h | N     | N     | N    | N     | N     | N     | N     | N    | N     | N    |
|                       | 24h     | N     | N     | N    | N     | N     | N     | N     | N    | N     | N    |
|                       | 48h     | N     | N     | N    | N     | N     | N     | N     | N    | N     | N    |
|                       | 72h     | N     | N     | N    | N     | N     | N     | N     | N    | N     | N    |
| Cardio vascular signs | Imm./4h | N     | N     | N    | N     | N     | N     | N     | N    | N     | N    |
|                       | 24h     | N     | N     | N    | N     | N     | N     | N     | N    | N     | N    |
|                       | 48h     | N     | N     | N    | N     | N     | N     | N     | N    | N     | N    |
|                       | 72h     | N     | N     | N    | N     | N     | N     | N     | N    | N     | N    |
| Salivation            | Imm./4h | N     | N     | N    | N     | N     | N     | N     | N    | N     | N    |
|                       | 24h     | N     | N     | N    | N     | N     | N     | N     | N    | N     | N    |
|                       | 48h     | N     | N     | N    | N     | N     | N     | N     | N    | N     | N    |
|                       | 72h     | N     | N     | N    | N     | N     | N     | N     | N    | N     | N    |
| Piloerection          | Imm./4h | N     | N     | N    | N     | N     | N     | N     | N    | N     | N    |
|                       | 24h     | N     | N     | N    | N     | N     | N     | N     | N    | N     | N    |
|                       | 48h     | N     | N     | N    | N     | N     | N     | N     | N    | N     | N    |
|                       | 72h     | N     | N     | N    | N     | N     | N     | N     | N    | N     | N    |
| Analgesia             | Imm./4h | N     | N     | N    | N     | N     | N     | N     | N    | N     | N    |
|                       | 24h     | N     | N     | N    | N     | N     | N     | N     | N    | N     | N    |
|                       | 48h     | N     | N     | N    | N     | N     | N     | N     | N    | N     | N    |
|                       | 72h     | N     | N     | N    | N     | N     | N     | N     | N    | N     | N    |
| Muscle tone           | Imm./4h | N     | N     | N    | N     | N     | N     | N     | N    | N     | N    |
|                       | 24h     | N     | N     | N    | N     | N     | N     | N     | N    | N     | N    |
|                       | 48h     | N     | N     | N    | N     | N     | N     | N     | N    | N     | N    |
|                       | 72h     | N     | N     | N    | N     | N     | N     | N     | N    | N     | N    |
| Gastrointestinal      | Imm./4h | N     | N     | N    | N     | N     | N     | N     | N    | N     | N    |
|                       | 24h     | N     | N     | N    | N     | N     | N     | N     | N    | N     | N    |
|                       | 48h     | N     | N     | N    | N     | N     | N     | N     | N    | N     | N    |
|                       | 72h     | N     | N     | N    | N     | N     | N     | N     | N    | N     | N    |
| Skin                  | Imm./4h | N     | N     | N    | N     | N     | N     | N     | N    | N     | N    |
|                       | 24h     | N     | N     | N    | N     | N     | N     | N     | N    | N     | N    |
|                       | 48h     | N     | N     | N    | N     | N     | N     | N     | N    | N     | N    |
|                       | 72h     | N     | N     | N    | N     | N     | N     | N     | N    | N     | N    |
| Body weight           | Final   | 22.25 | 23.05 | 22.9 | 25.05 | 24.15 | 23.95 | 24.15 | 23.8 | 24.85 | 23.5 |
